# Supplementary material for: Chlamydia diagnosis rate in England in 2012: an ecological study of local authorities
Source: PubMed Central journal article supplement (PMC5520241; doi:10.1136/sextrans-2015-052441), 2016-08-31
Supplement: sextrans-2015-052441supp001.pdf [file sextrans-2015-052441supp001.pdf]

Supplementary Material

Table S1: Description of coverage, positivity and chlamydia diagnosis rate by population size category and gender and unadjusted prevalence ratios for the association between achieving a chlamydia diagnosis rate  $\geq 2,300$  cases per 100,000 and population size for local authorities in England in 2012

| Population size | No. of LAs | LAs meeting recommendation |       | Coverage (%) |       | Positivity (%) |      | Chlamydia diagnosis rate per 100,000 |       | Unadjusted PR (95% CI) | Test for trend p value |
|-----------------|------------|----------------------------|-------|--------------|-------|----------------|------|--------------------------------------|-------|------------------------|------------------------|
|                 |            | N                          | %     | Mean         | SD    | Mean           | SD   | Mean                                 | SD    |                        |                        |
| <b>Women</b>    |            |                            |       |              |       |                |      |                                      |       |                        |                        |
| 1-5000          | 68         | 8                          | 11.76 | 26.16        | 7.58  | 6.63           | 1.35 | 1,708                                | 526   | 0.16 (0.08-0.33)       |                        |
| 5001-10000      | 143        | 59                         | 41.26 | 32.17        | 16.93 | 7.16           | 1.35 | 2,286                                | 1,183 | 0.58 (0.43-0.78)       |                        |
| 10001-15000     | 45         | 29                         | 64.44 | 36.83        | 12.19 | 7.64           | 1.20 | 2,811                                | 1,029 | 0.90 (0.66-1.24)       |                        |
| 15001-20000     | 40         | 23                         | 57.50 | 36.84        | 13.49 | 7.16           | 1.23 | 2,637                                | 1,103 | 0.81 (0.56-1.15)       |                        |
| 20001+          | 28         | 20                         | 71.43 | 39.25        | 14.17 | 7.54           | 1.29 | 2,943                                | 1,191 | Reference              | <0.0001                |
| <b>Men</b>      |            |                            |       |              |       |                |      |                                      |       |                        |                        |
| 1-5000          | 54         | 0                          | 0     | 10.72        | 4.69  | 9.21           | 2.86 | 913                                  | 295   | -                      |                        |
| 5001-10000      | 150        | 11                         | 7.33  | 14.00        | 10.04 | 9.16           | 2.92 | 1,154                                | 645   | 0.76 (0.22-2.56)       |                        |
| 10001-15000     | 49         | 8                          | 16.33 | 17.22        | 8.10  | 9.53           | 2.36 | 1,550                                | 657   | 1.69 (0.48-5.88)       |                        |
| 15001-20000     | 40         | 6                          | 15.00 | 17.14        | 8.93  | 9.07           | 2.49 | 1,504                                | 846   | 1.55 (0.42-5.71)       |                        |
| 20001+          | 31         | 3                          | 9.68  | 18.01        | 7.57  | 8.66           | 2.66 | 1,443                                | 470   | Reference              | 0.2619*                |

LA – Local Authority; PR – prevalence ratio; 95% CI – 95% Confidence Interval; SD – Standard Deviation; \*excluding population group 1-5000
